# Supplementary material for: A systematic study of TMOn (TM = V, Cr, Mn, and Fe; n = 3 and 6) clusters embedded in a PtS2 monolayer
Source: Royal Society of Chemistry journal article supplement (doi:10.1039/d4na00465e), 2024-01-01
Supplement: d4na00465e1.pdf [file d4na00465e1.pdf]

## A systematic study of $\text{TMO}_n$ (TM = V, Cr, Mn, and Fe; $n = 3$ and 6) cluster embedded in $\text{PtS}_2$ monolayer

Nguyen Thanh Tien,<sup>1</sup> J. Guerrero-Sanchez,<sup>2</sup> and D. M. Hoat<sup>3,4,\*</sup>

<sup>1</sup>College of Natural Sciences, Can Tho University, 3-2 Road, Can Tho City 900000, Vietnam

<sup>2</sup>Universidad Nacional Autónoma de México, Centro de Nanociencias y Nanotecnología, Apartado Postal 14, Ensenada, Baja California, Código Postal 22800, Mexico

<sup>3</sup>Institute of Theoretical and Applied Research, Duy Tan University, Ha Noi 100000, Viet Nam

<sup>4</sup>Faculty of Natural Sciences, Duy Tan University, Da Nang 550000, Viet Nam

\*Corresponding author: [dominhhoat@duytan.edu.vn](mailto:dominhhoat@duytan.edu.vn)

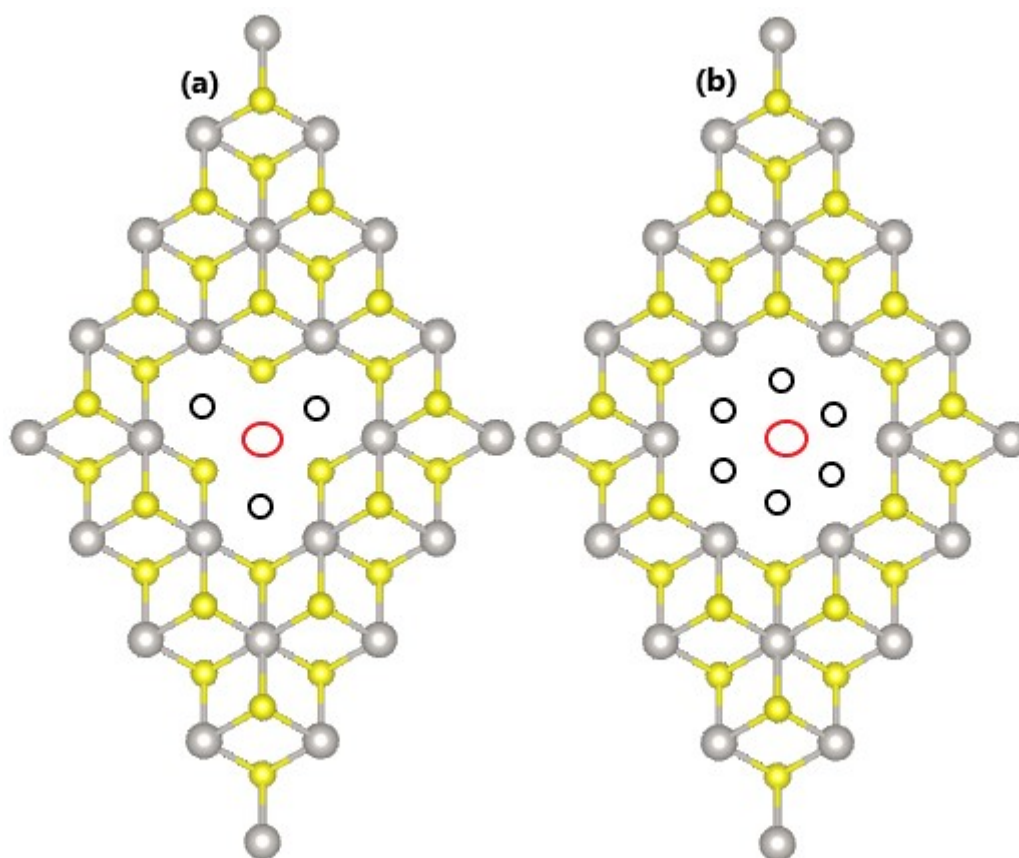

Figure S1: Atomic structure of  $\text{PtS}_2$  monolayer with (a)  $\text{Pt}_{3-}$  and (b)  $\text{Pt}_{6-}$ -type multivacancies (Red circle: Pt vacancy; Black circle: S vacancy).

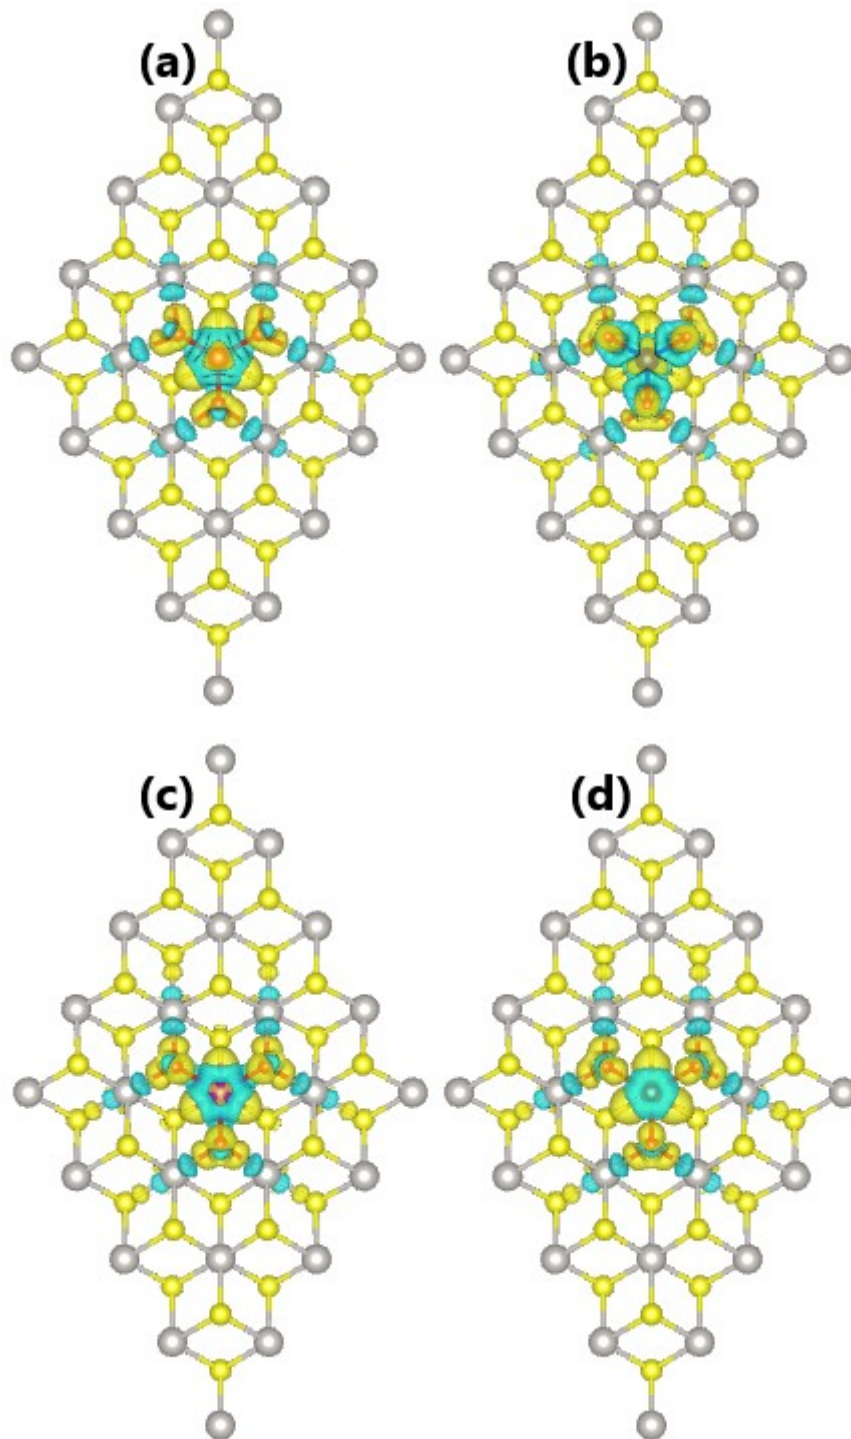

Figure S2: Charge density difference (Iso-surface value:  $0.005 e/\text{\AA}^3$ ; Yellow surface: charge accumulation; Aqua surface: charge depletion) in PtS<sub>2</sub> monolayer doped with (a) VO<sub>3</sub>, (b) CrO<sub>3</sub>, (c) MnO<sub>3</sub>, and (d) FeO<sub>3</sub> cluster.

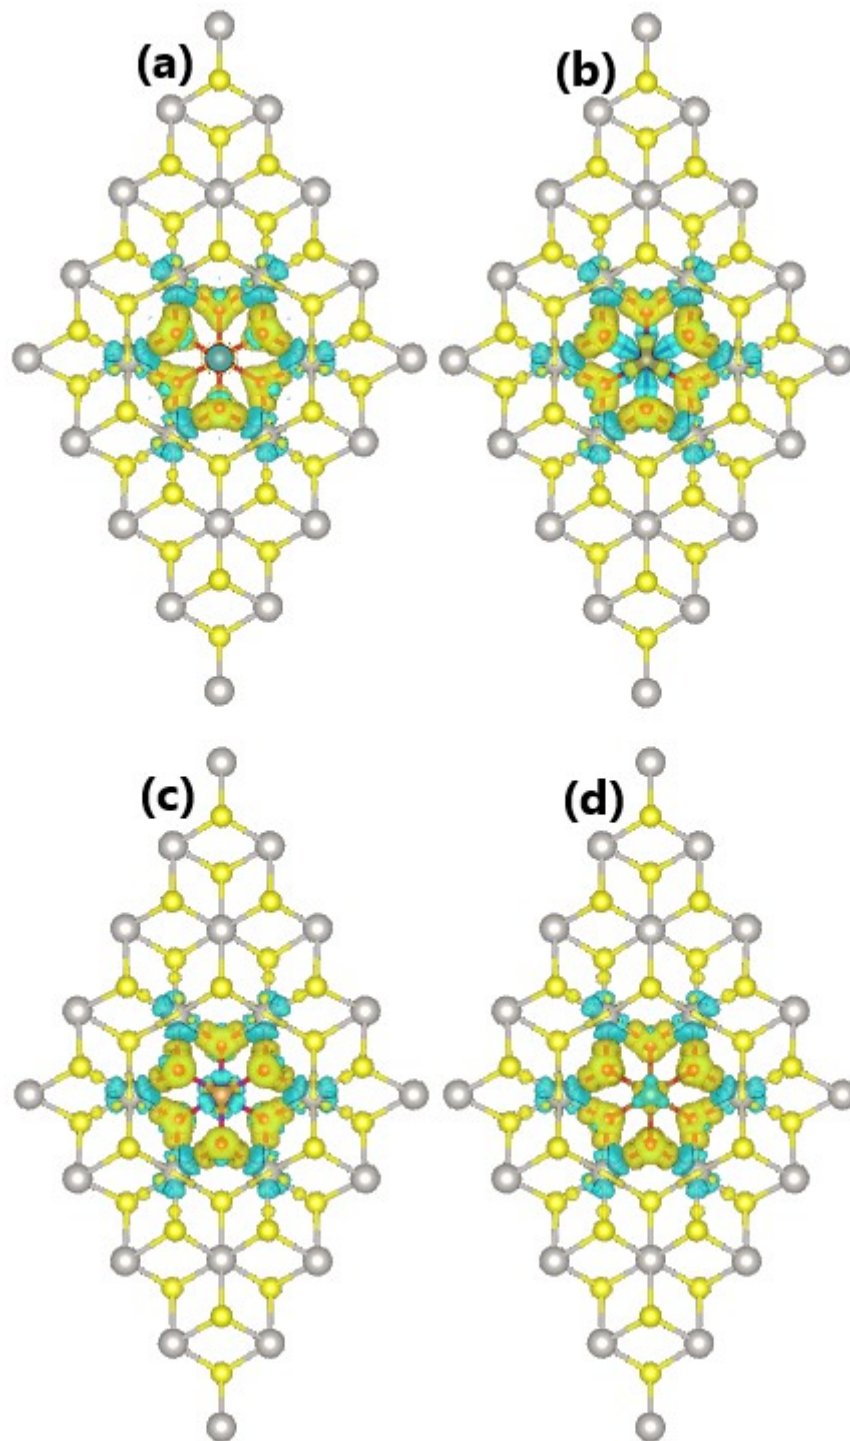

Figure S3: Charge density difference (Iso-surface value:  $0.005 e/\text{\AA}^3$ ; Yellow surface: charge accumulation; Aqua surface: charge depletion) in PtS<sub>2</sub> monolayer doped with (a) VO<sub>6</sub>, (b) CrO<sub>6</sub>, (c) MnO<sub>6</sub>, and (d) FeO<sub>6</sub> cluster.
